# Supplementary material for: Influence of the Abiotic Elicitors Ag Salts of Aspartic Acid Derivatives, Self-Organized in Nanofibers with Monomeric and Dimeric Molecular Structures, on the Antioxidant Activity and Stevioside Content in Micropropagated Stevia rebaudiana Bert
Source: Plants (Basel). 2023 Oct 14;12(20):3574. doi: 10.3390/plants12203574 (PMC10610515; doi:10.3390/plants12203574)
Supplement: Supplementary file 1 [file plants-12-03574-s001.zip]

Archive with 7 entries (7 files):
- Figures S1-S7.pdf
- Table S1. MDA, -SH, H2O2, Proline.pdf
- Table S2. SOD, CAT, APX, GPO.pdf
- Table S3. Morphol. parameters NF2.pdf
- Table S4. WS-,LS-, Flav., Phen., DPPH, FRAP.pdf
- Table S5. Steviosides.pdf
- Table S6. Morphol.parameters.pdf
