# Supplementary material for: Influence of the Abiotic Elicitors Ag Salts of Aspartic Acid Derivatives, Self-Organized in Nanofibers with Monomeric and Dimeric Molecular Structures, on the Antioxidant Activity and Stevioside Content in Micropropagated Stevia rebaudiana Bert
Source: Plants (Basel). 2023 Oct 14;12(20):3574. doi: 10.3390/plants12203574 (PMC10610515; doi:10.3390/plants12203574)
Supplement: Supplementary file 1 [file plants-12-03574-s001.zip › Table S1. MDA, -SH, H2O2, Proline.pdf]

|                 |       |   |   |   |  |
|-----------------|-------|---|---|---|--|
| MDA-NF1 Ag salt |       |   |   |   |  |
| 5               | 14.08 | x |   |   |  |
| 4               | 22.45 |   | x |   |  |
| 3               | 23.11 |   | x |   |  |
| 2               | 24.53 |   | x |   |  |
| 1               | 37.91 |   |   | x |  |
| LSD             | 2.332 |   |   |   |  |
| MDA-NF2 Ag salt |       |   |   |   |  |
| 3               | 33.54 | x |   |   |  |
| 2               | 34.25 | x |   |   |  |
| 4               | 35.19 | x | x |   |  |
| 5               | 37.84 |   | x |   |  |
| 1               | 37.91 |   | x |   |  |
| LSD             | 3.257 |   |   |   |  |

|                 |       |   |   |   |   |
|-----------------|-------|---|---|---|---|
| -SH NF1 Ag salt |       |   |   |   |   |
| 5               | 0.15  | x |   |   |   |
| 4               | 0.11  | x |   |   |   |
| 3               | 0.34  |   | x |   |   |
| 2               | 0.46  |   |   | x |   |
| 1               | 1.39  |   |   |   | x |
| LSD             | 0.062 |   |   |   |   |
| -SH NF2 Ag salt |       |   |   |   |   |
| 5               | 0.79  | x |   |   |   |
| 2               | 0.96  |   | x |   |   |
| 4               | 0.99  |   | x | x |   |
| 3               | 1.08  |   |   | x |   |
| 1               | 1.39  |   |   |   | x |
| LSD             | 0.096 |   |   |   |   |

|                                            |       |   |   |   |   |
|--------------------------------------------|-------|---|---|---|---|
| H <sub>2</sub> O <sub>2</sub> -NF1 Ag salt |       |   |   |   |   |
| 3                                          | 6.33  | x |   |   |   |
| 2                                          | 10.15 |   | x |   |   |
| 4                                          | 15.91 |   |   | x |   |
| 5                                          | 32.91 |   |   |   | x |
| 1                                          | 33.37 |   |   |   | x |
| LSD                                        | 2.077 |   |   |   |   |
| H <sub>2</sub> O <sub>2</sub> -NF2 Ag salt |       |   |   |   |   |
| 2                                          | 4.78  | x |   |   |   |
| 3                                          | 5.06  | x |   |   |   |
| 4                                          | 9.98  |   | x |   |   |
| 1                                          | 33.37 |   |   | x |   |
| 5                                          | 33.71 |   |   | x |   |
| LSD                                        | 1.995 |   |   |   |   |

|                     |       |   |   |   |   |
|---------------------|-------|---|---|---|---|
| Proline-NF1 Ag salt |       |   |   |   |   |
| 4                   | 2.06  | x |   |   |   |
| 3                   | 2.82  |   | x |   |   |
| 2                   | 3.6   |   |   | x |   |
| 1                   | 3.65  |   |   | x |   |
| 5                   | 7.11  |   |   |   | x |
| LSD                 | 0.385 |   |   |   |   |
| Proline-NF2 Ag salt |       |   |   |   |   |
| 4                   | 2.903 | x |   |   |   |
| 3                   | 3.503 |   | x |   |   |
| 1                   | 3.65  |   | x |   |   |
| 2                   | 3.91  |   | x |   |   |
| 5                   | 8.2   |   |   | x |   |
| LSD                 | 0.44  |   |   |   |   |
