# Supplementary material for: Influence of the Abiotic Elicitors Ag Salts of Aspartic Acid Derivatives, Self-Organized in Nanofibers with Monomeric and Dimeric Molecular Structures, on the Antioxidant Activity and Stevioside Content in Micropropagated Stevia rebaudiana Bert
Source: Plants (Basel). 2023 Oct 14;12(20):3574. doi: 10.3390/plants12203574 (PMC10610515; doi:10.3390/plants12203574)
Supplement: Supplementary file 1 [file plants-12-03574-s001.zip › Table S2. SOD, CAT, APX, GPO.pdf]

|                 |        |   |   |   |   |   |
|-----------------|--------|---|---|---|---|---|
| SOD-NF1 Ag salt |        |   |   |   |   |   |
| 1               | 60.41  | x |   |   |   |   |
| 4               | 173.93 |   | x |   |   |   |
| 5               | 192.82 |   |   | x |   |   |
| 2               | 224.0  |   |   |   | x |   |
| 3               | 286.89 |   |   |   |   | x |
| LSD             | 18.352 |   |   |   |   |   |
| SOD-NF2 Ag salt |        |   |   |   |   |   |
| 1               | 60.41  | x |   |   |   |   |
| 5               | 238.21 |   | x |   |   |   |
| 2               | 239.2  |   | x |   |   |   |
| 3               | 302.72 |   |   | x |   |   |
| 4               | 380.27 |   |   |   | x |   |
| LSD             | 24.199 |   |   |   |   |   |

|                 |       |   |   |   |  |
|-----------------|-------|---|---|---|--|
| CAT-NF1 Ag salt |       |   |   |   |  |
| 5               | 9.07  | x |   |   |  |
| 1               | 9.8   | x | x |   |  |
| 2               | 10.76 |   | x |   |  |
| 4               | 12.67 |   |   | x |  |
| 3               | 13.34 |   |   | x |  |
| LSD             | 1.023 |   |   |   |  |
| CAT-NF2 Ag salt |       |   |   |   |  |
| 1               | 9.8   | x |   |   |  |
| 5               | 10.68 | x |   |   |  |
| 4               | 12.87 |   | x |   |  |
| 3               | 13.53 |   | x |   |  |
| 2               | 15.19 |   |   | x |  |
| LSD             | 1.142 |   |   |   |  |

|                 |       |   |   |   |   |   |
|-----------------|-------|---|---|---|---|---|
| APX-NF1 Ag salt |       |   |   |   |   |   |
| 4               | 0.103 | x |   |   |   |   |
| 5               | 0.19  |   | x |   |   |   |
| 2               | 0.23  |   |   | x |   |   |
| 3               | 0.27  |   |   |   | x |   |
| 1               | 0.39  |   |   |   |   | x |
| LSD             | 0.022 |   |   |   |   |   |
| APX-NF2 Ag salt |       |   |   |   |   |   |
| 1               | 0.39  | x |   |   |   |   |
| 4               | 0.503 |   | x |   |   |   |
| 5               | 0.51  |   | x |   |   |   |
| 3               | 0.52  |   | x |   |   |   |
| 2               | 0.57  |   |   | x |   |   |
| LSD             | 0.05  |   |   |   |   |   |

|                 |       |   |   |   |   |   |
|-----------------|-------|---|---|---|---|---|
| GPX-NF1 Ag salt |       |   |   |   |   |   |
| 5               | 0.047 | x |   |   |   |   |
| 4               | 0.51  |   | x |   |   |   |
| 2               | 1.03  |   |   | x |   |   |
| 1               | 1.37  |   |   |   | x |   |
| 3               | 1.62  |   |   |   |   | x |
| LSD             | 0.099 |   |   |   |   |   |
| GPX-NF2 Ag salt |       |   |   |   |   |   |
| 5               | 0.05  | x |   |   |   |   |
| 4               | 0.903 |   | x |   |   |   |
| 1               | 1.37  |   |   | x |   |   |
| 3               | 1.98  |   |   |   | x |   |
| 2               | 2.8   |   |   |   |   | x |
| LSD             | 0.156 |   |   |   |   |   |
