# Supplementary material for: Influence of the Abiotic Elicitors Ag Salts of Aspartic Acid Derivatives, Self-Organized in Nanofibers with Monomeric and Dimeric Molecular Structures, on the Antioxidant Activity and Stevioside Content in Micropropagated Stevia rebaudiana Bert
Source: Plants (Basel). 2023 Oct 14;12(20):3574. doi: 10.3390/plants12203574 (PMC10610515; doi:10.3390/plants12203574)
Supplement: Supplementary file 1 [file plants-12-03574-s001.zip › Table S3. Morphol. parameters NF2.pdf]

|                                 |       |   |   |   |   |  |  |
|---------------------------------|-------|---|---|---|---|--|--|
| FWshoot<br>NF2 Ag salt          |       |   |   |   |   |  |  |
| 5                               | 0.061 | x |   |   |   |  |  |
| 3                               | 0.105 |   | x |   |   |  |  |
| 1                               | 0.115 |   | x | x |   |  |  |
| 2                               | 0.121 |   |   | x |   |  |  |
| 4                               | 0.139 |   |   |   | x |  |  |
| LSD                             | 0.01  |   |   |   |   |  |  |
| DWshoot<br>NF2 Ag salt          |       |   |   |   |   |  |  |
| 5                               | 0.009 | x |   |   |   |  |  |
| 2                               | 0.013 |   | x |   |   |  |  |
| 4                               | 0.014 |   | x | x |   |  |  |
| 3                               | 0.015 |   |   | x |   |  |  |
| 1                               | 0.018 |   |   |   | x |  |  |
| LSD                             | 0.002 |   |   |   |   |  |  |
| Shoot<br>height NF2<br>Ag salt  |       |   |   |   |   |  |  |
| 5                               | 2.16  | x |   |   |   |  |  |
| 4                               | 4.8   |   | x |   |   |  |  |
| 3                               | 5.1   |   | x |   |   |  |  |
| 1                               | 5.97  |   |   | x |   |  |  |
| 2                               | 6.46  |   |   |   | x |  |  |
| LSD                             | 0.466 |   |   |   |   |  |  |
| Shoot<br>number<br>NF2 Ag salt  |       |   |   |   |   |  |  |
| 1                               | 1.0   | x |   |   |   |  |  |
| 5                               | 1.3   |   | x |   |   |  |  |
| 3                               | 1.39  |   | x | x |   |  |  |
| 2                               | 1.4   |   | x | x |   |  |  |
| 4                               | 1.49  |   |   | x |   |  |  |
| LSD                             | 0.121 |   |   |   |   |  |  |
| Root init.<br>NF2 Ag salt       |       |   |   |   |   |  |  |
| 1                               | 0.0   | x |   |   |   |  |  |
| 4                               | 34.1  |   | x |   |   |  |  |
| 2                               | 37.5  |   | x | x |   |  |  |
| 5                               | 40.0  |   |   | x |   |  |  |
| 3                               | 62.5  |   |   |   | x |  |  |
| LSD                             | 3.656 |   |   |   |   |  |  |
| No<br>internodes<br>NF2 Ag salt |       |   |   |   |   |  |  |
| 5                               | 1.59  | x |   |   |   |  |  |

|                                     |       |   |   |   |   |   |  |
|-------------------------------------|-------|---|---|---|---|---|--|
| 1                                   | 2.5   |   | x |   |   |   |  |
| 4                                   | 3.45  |   |   | x |   |   |  |
| 3                                   | 3.85  |   |   |   | x |   |  |
| 2                                   | 4.25  |   |   |   |   | x |  |
| LSD                                 | 0.298 |   |   |   |   |   |  |
| Internodes<br>length NF2<br>Ag salt |       |   |   |   |   |   |  |
| 3                                   | 1.32  | x |   |   |   |   |  |
| 5                                   | 1.36  | x |   |   |   |   |  |
| 4                                   | 1.38  | x | x |   |   |   |  |
| 1                                   | 1.5   |   | x | x |   |   |  |
| 2                                   | 1.52  |   |   | x |   |   |  |
| LSD                                 | 0.129 |   |   |   |   |   |  |
| Microp.rate<br>NF2 Ag salt          |       |   |   |   |   |   |  |
| 5                                   | 2.07  | x |   |   |   |   |  |
| 1                                   | 2.5   |   | x |   |   |   |  |
| 4                                   | 5.14  |   |   | x |   |   |  |
| 3                                   | 5.35  |   |   | x |   |   |  |
| 2                                   | 5.95  |   |   |   | x |   |  |
| LSD                                 | 0.409 |   |   |   |   |   |  |
