# Supplementary material for: Influence of the Abiotic Elicitors Ag Salts of Aspartic Acid Derivatives, Self-Organized in Nanofibers with Monomeric and Dimeric Molecular Structures, on the Antioxidant Activity and Stevioside Content in Micropropagated Stevia rebaudiana Bert
Source: Plants (Basel). 2023 Oct 14;12(20):3574. doi: 10.3390/plants12203574 (PMC10610515; doi:10.3390/plants12203574)
Supplement: Supplementary file 1 [file plants-12-03574-s001.zip › Table S4. WS-,LS-, Flav., Phen., DPPH, FRAP.pdf]

|                |        |   |   |   |   |
|----------------|--------|---|---|---|---|
| WS-NF1 Ag salt |        |   |   |   |   |
| 2              | 50.03  | x |   |   |   |
| 5              | 58.72  |   | x |   |   |
| 4              | 59.103 |   | x |   |   |
| 1              | 59.91  |   | x |   |   |
| 3              | 60.27  |   | x |   |   |
| LSD            | 5.253  |   |   |   |   |
| WS-NF2 Ag salt |        |   |   |   |   |
| 1              | 59.91  | x |   |   |   |
| 4              | 87.303 |   | x |   |   |
| 5              | 91.81  |   | x |   |   |
| 2              | 104.07 |   |   | x |   |
| 3              | 115.29 |   |   |   | x |
| LSD            | 8.507  |   |   |   |   |

|                |       |   |   |   |   |
|----------------|-------|---|---|---|---|
| LS-NF1 Ag salt |       |   |   |   |   |
| 5              | 16.0  | x |   |   |   |
| 1              | 16.13 | x |   |   |   |
| 4              | 22.0  |   | x |   |   |
| 2              | 25.73 |   |   | x |   |
| 3              | 39.45 |   |   |   | x |
| LSD            | 2.309 |   |   |   |   |
| LS-NF2 Ag salt |       |   |   |   |   |
| 4              | 5.63  | x |   |   |   |
| 5              | 8.75  |   | x |   |   |
| 3              | 11.88 |   |   | x |   |
| 2              | 11.88 |   |   | x |   |
| 1              | 16.13 |   |   |   | x |
| LSD            | 1.037 |   |   |   |   |

|                           |       |   |   |   |   |   |
|---------------------------|-------|---|---|---|---|---|
| Phenols<br>NF1 Ag<br>salt |       |   |   |   |   |   |
| 5                         | 0.6   | x |   |   |   |   |
| 4                         | 1.103 |   | x |   |   |   |
| 1                         | 2.33  |   |   | x |   |   |
| 2                         | 3.08  |   |   |   | x |   |
| 3                         | 4.05  |   |   |   |   | x |
| LSD                       | 0.231 |   |   |   |   |   |
| Phenols<br>NF2 Ag<br>salt |       |   |   |   |   |   |
| 1                         | 2.33  | x |   |   |   |   |
| 2                         | 18.93 |   | x |   |   |   |
| 5                         | 21.2  |   |   | x |   |   |
| 3                         | 22.22 |   |   | x |   |   |
| 4                         | 27.68 |   |   |   | x |   |
| LSD                       | 1.851 |   |   |   |   |   |

|                            |       |   |   |   |   |   |
|----------------------------|-------|---|---|---|---|---|
| Flavon.-<br>NF1 Ag<br>salt |       |   |   |   |   |   |
| 1                          | 4.58  | x |   |   |   |   |
| 5                          | 7.25  |   | x |   |   |   |
| 4                          | 9.02  |   |   | x |   |   |
| 2                          | 10.67 |   |   |   | x |   |
| 3                          | 15.65 |   |   |   |   | x |
| LSD                        | 0.918 |   |   |   |   |   |
| Flavon.-<br>NF2 Ag<br>salt |       |   |   |   |   |   |
| 1                          | 4.58  | x |   |   |   |   |
| 2                          | 6.39  |   | x |   |   |   |
| 5                          | 7.12  |   | x | x |   |   |
| 3                          | 7.76  |   |   | x |   |   |
| 4                          | 13.41 |   |   |   | x |   |
| LSD                        | 0.766 |   |   |   |   |   |

|                   |        |   |   |  |
|-------------------|--------|---|---|--|
| DPPH- NF1 Ag salt |        |   |   |  |
| 5                 | 68.45  | x |   |  |
| 4                 | 68.92  | x | x |  |
| 3                 | 69.83  | x | x |  |
| 1                 | 71.28  | x | x |  |
| 2                 | 74.89  |   | x |  |
| LSD               | 6.429  |   |   |  |
| DPPH- NF2 Ag salt |        |   |   |  |
| 1                 | 71.28  | x |   |  |
| 5                 | 90.0   |   | x |  |
| 2                 | 93.703 |   | x |  |
| 4                 | 94.303 |   | x |  |
| 3                 | 94.6   |   | x |  |
| LSD               | 8.115  |   |   |  |

|                  |        |   |   |   |   |
|------------------|--------|---|---|---|---|
| FRAP-NF1 Ag salt |        |   |   |   |   |
| 2                | 19.41  | x |   |   |   |
| 5                | 26.0   |   | x |   |   |
| 4                | 56.9   |   |   | x |   |
| 3                | 57.26  |   |   | x |   |
| 1                | 86.62  |   |   |   | x |
| LSD              | 4.992  |   |   |   |   |
| FRAP-NF2 Ag salt |        |   |   |   |   |
| 4                | 72.05  | x |   |   |   |
| 3                | 78.33  | x |   |   |   |
| 1                | 86.62  |   | x |   |   |
| 2                | 94.67  |   |   | x |   |
| 5                | 103.03 |   |   |   | x |
| LSD              | 7.97   |   |   |   |   |
