# Supplementary material for: Influence of the Abiotic Elicitors Ag Salts of Aspartic Acid Derivatives, Self-Organized in Nanofibers with Monomeric and Dimeric Molecular Structures, on the Antioxidant Activity and Stevioside Content in Micropropagated Stevia rebaudiana Bert
Source: Plants (Basel). 2023 Oct 14;12(20):3574. doi: 10.3390/plants12203574 (PMC10610515; doi:10.3390/plants12203574)
Supplement: Supplementary file 1 [file plants-12-03574-s001.zip › Table S5. Steviosides.pdf]

|            |       |   |   |   |   |   |
|------------|-------|---|---|---|---|---|
| Stevioside |       |   |   |   |   |   |
| 5          | 2.4   | x |   |   |   |   |
| 4          | 2.94  | x | x |   |   |   |
| 3          | 3.63  |   | x |   |   |   |
| 2          | 3.72  |   | x |   |   |   |
| 6          | 10.25 |   |   | x |   |   |
| 9          | 10.98 |   |   | x | x |   |
| 7          | 11.0  |   |   | x | x |   |
| 8          | 11.65 |   |   |   | x |   |
| 1          | 18.61 |   |   |   |   | x |
| LSD        | 0.843 |   |   |   |   |   |

|               |       |   |   |   |   |   |   |   |   |
|---------------|-------|---|---|---|---|---|---|---|---|
| RebaudiosideA |       |   |   |   |   |   |   |   |   |
| 4             | 0.23  | x |   |   |   |   |   |   |   |
| 5             | 1.17  |   | x |   |   |   |   |   |   |
| 3             | 1.93  |   |   | x |   |   |   |   |   |
| 2             | 2.95  |   |   |   | x |   |   |   |   |
| 9             | 3.25  |   |   |   | x | x |   |   |   |
| 6             | 3.58  |   |   |   |   | x | x |   |   |
| 8             | 3.8   |   |   |   |   |   | x | x |   |
| 7             | 4.12  |   |   |   |   |   |   | x |   |
| 1             | 10.47 |   |   |   |   |   |   |   | x |
| LSD           | 0.382 |   |   |   |   |   |   |   |   |

|        |       |   |   |   |   |   |   |   |
|--------|-------|---|---|---|---|---|---|---|
| Sugars |       |   |   |   |   |   |   |   |
| 6      | 10.76 | x |   |   |   |   |   |   |
| 9      | 12.41 | x | x |   |   |   |   |   |
| 1      | 15.25 |   | x |   |   |   |   |   |
| 8      | 19.52 |   |   | x |   |   |   |   |
| 7      | 20.18 |   |   | x |   |   |   |   |
| 3      | 34.81 |   |   |   | x |   |   |   |
| 5      | 39.35 |   |   |   |   | x |   |   |
| 4      | 42.42 |   |   |   |   |   | x |   |
| 2      | 64.28 |   |   |   |   |   |   | x |
| LSD    | 2.856 |   |   |   |   |   |   |   |
