# Supplementary material for: Influence of the Abiotic Elicitors Ag Salts of Aspartic Acid Derivatives, Self-Organized in Nanofibers with Monomeric and Dimeric Molecular Structures, on the Antioxidant Activity and Stevioside Content in Micropropagated Stevia rebaudiana Bert
Source: Plants (Basel). 2023 Oct 14;12(20):3574. doi: 10.3390/plants12203574 (PMC10610515; doi:10.3390/plants12203574)
Supplement: Supplementary file 1 [file plants-12-03574-s001.zip › Table S6. Morphol.parameters.pdf]

|                              |       |   |   |   |   |
|------------------------------|-------|---|---|---|---|
| FWshoot<br>NF1Ag salt        |       |   |   |   |   |
| 1                            | 0.115 | x |   |   |   |
| 5                            | 0.237 |   | x |   |   |
| 2                            | 0.311 |   |   | x |   |
| 3                            | 0.374 |   |   |   | x |
| 4                            | 0.389 |   |   |   | x |
| LSD                          | 0.028 |   |   |   |   |
| DWshoot<br>NF1Ag salt        |       |   |   |   |   |
| 1                            | 0.018 | x |   |   |   |
| 5                            | 0.02  | x |   |   |   |
| 2                            | 0.043 |   | x |   |   |
| 4                            | 0.066 |   |   | x |   |
| 3                            | 0.076 |   |   |   | x |
| LSD                          | 0.005 |   |   |   |   |
| Shoot height<br>NF1 Ag salt  |       |   |   |   |   |
| 5                            | 2.01  | x |   |   |   |
| 4                            | 5.48  |   | x |   |   |
| 1                            | 5.97  |   | x | x |   |
| 3                            | 6.39  |   |   | x |   |
| 2                            | 10.14 |   |   |   | x |
| LSD                          | 0.594 |   |   |   |   |
| Shoot number<br>NF1 Ag salt  |       |   |   |   |   |
| 1                            | 1.0   | x |   |   |   |
| 5                            | 1.44  |   | x |   |   |
| 2                            | 1.45  |   | x |   |   |
| 3                            | 1.99  |   |   | x |   |
| 4                            | 3.07  |   |   |   | x |
| LSD                          | 0.175 |   |   |   |   |
| Root init. NF1<br>Ag salt    |       |   |   |   |   |
| 1                            | 0.0   | x |   |   |   |
| 3                            | 5.13  |   | x |   |   |
| 4                            | 5.17  |   | x |   |   |
| 5                            | 5.26  |   | x |   |   |
| 2                            | 8.0   |   |   | x |   |
| LSD                          | 0.489 |   |   |   |   |
| No internodes<br>NF1 Ag salt |       |   |   |   |   |
| 5                            | 2.03  | x |   |   |   |
| 1                            | 2.5   |   | x |   |   |
| 2                            | 3.9   |   |   | x |   |
| 4                            | 4.9   |   |   |   | x |

|                                     |       |   |   |   |   |
|-------------------------------------|-------|---|---|---|---|
| 3                                   | 5.1   |   |   |   | x |
| LSD                                 | 0.354 |   |   |   |   |
| Internodes<br>length NF1 Ag<br>salt |       |   |   |   |   |
| 5                                   | 1.01  | x |   |   |   |
| 4                                   | 1.08  | x |   |   |   |
| 3                                   | 1.25  |   | x |   |   |
| 1                                   | 1.5   |   |   | x |   |
| 2                                   | 2.6   |   |   |   | x |
| LSD                                 | 0.145 |   |   |   |   |
| Microp.rate<br>NF1 Ag salt          |       |   |   |   |   |
| 1                                   | 2.5   | x |   |   |   |
| 5                                   | 2.92  | x |   |   |   |
| 2                                   | 5.66  |   | x |   |   |
| 3                                   | 10.15 |   |   | x |   |
| 4                                   | 15.04 |   |   |   | x |
| LSD                                 | 0.789 |   |   |   |   |
